# Supplementary material
Source: HighWire-hosted journal article supplement (https://heart.bmj.com/content/110/5/359)
Supplement: inline-supplementary-material-1 [file inline-supplementary-material-1.pdf]

**UK Heart Failure with Preserved Ejection Fraction Registry:  
rationale and design of UK HFpEF**

**Supplemental appendix**

## The UK HFpEF Collaborative Group

### Executive Steering Committee

| <b>Name</b>                     | <b>Affiliation</b>                                                                                                                                                   | <b>Expertise</b>                                                                                  |
|---------------------------------|----------------------------------------------------------------------------------------------------------------------------------------------------------------------|---------------------------------------------------------------------------------------------------|
| Christopher A Miller            | Manchester University NHS Foundation Trust<br>University of Manchester                                                                                               | Chair                                                                                             |
| Abdallah Al-Mohammad            | Sheffield Teaching Hospitals NHS Trust                                                                                                                               | National Institute for Health and Care Excellence (NICE) guidelines                               |
| Janine Beezer                   | South Tyneside and Sunderland NHS Trust                                                                                                                              | Specialist Clinical Pharmacist Heart Failure                                                      |
| Emma Columbine                  | Manchester University NHS Foundation Trust                                                                                                                           | Sponsor representative                                                                            |
| David Cotterell                 | Manchester University NHS Foundation Trust                                                                                                                           | Project manager                                                                                   |
| Simon Fisher                    | National Institute for Health and Care Research (NIHR) – British Heart Foundation (BHF) Cardiovascular Partnership                                                   | NIHR-BHF Cardiovascular Partnership Manager                                                       |
| Nick Hartshorne-Evans           | Pumping Marvellous Foundation                                                                                                                                        | Patient representative                                                                            |
| Laurence Humphreys-Davies       | British Society for Heart Failure                                                                                                                                    | Patient representative                                                                            |
| Rebecca Hyland                  | Wiltshire Health and Care                                                                                                                                            | Heart Failure Nurse Specialist                                                                    |
| R Thomas Lumbers                | UCL Institute of Health Informatics<br>NIHR University College London Hospitals<br>Biomedical Research Centre<br>Barts Health NHS Trust<br>UCLH NHS Foundation Trust | Genomics; electronic health record; phenotyping                                                   |
| Gerry P McCann                  | University of Leicester<br>NIHR Leicester Biomedical Research Centre,<br>Glenfield Hospital, Leicester, UK                                                           | Cardiovascular magnetic resonance imaging                                                         |
| Maria F Paton<br>Shaun Robinson | University of Leeds<br>Imperial College Healthcare NHS Trust                                                                                                         | Echocardiography                                                                                  |
| Mark C Petrie                   | University of Glasgow                                                                                                                                                | Trials/therapeutics                                                                               |
| Cathie Sudlow                   | BHF Data Science Centre, Health Data Research UK                                                                                                                     | Health data (linkages, curation pipelines, trusted research environments); epidemiological design |

### Patient Advisory Group

Laurence Humphreys-Davies, Nick Hartshorne-Evans, Richard Cleverley, Andy Smith, Mike Wardle, Sarah Worsnop.

### UK-wide Network and Working Group

(Listed in alphabetical order)

**Barts Health NHS Trust and University College London**

R Thomas Lumbers, Charlotte Manisty, James Moon

**Barts Health NHS Trust, Queen Mary University of London and BHF Data Science Centre**

Steffen E Petersen

**Betsi Cadwaldr University Healthboard**

Satheesh Balakrishnan Nair

**BHF Data Science Centre, Health Data Research UK**

Cathie Sudlow

**Bradford Teaching Hospitals NHS Foundation Trust**

Andrew Clegg, Jivendra Gosai

**Buckinghamshire Healthcare NHS Trust**

Mayooran Shanmuganathan

**Cambridge University Hospitals NHS Foundation Trust**

Catriona Bhagra, Christi Deaton

**Countess of Chester Hospital NHS Foundation Trust**

Joanne Bateman, Jennifer Llewellyn

**Cwm Taf Morgannwg University Health Board**

Rhys Williams

**George Eliot Hospital NHS Trust**

Asok Venkatamaran

**Guy's and St Thomas' NHS Foundation Trust**

Rebekah Schiff

**Hull University Teaching Hospitals NHS Trust**

Andrew L Clark

**Imperial College Healthcare NHS Trust**

Jamil Mayet, Martin R Wilkins

**Imperial College London**

Manuel Mayr (Proteomics)

**Jersey General Hospital**

Lee-Anne Penn, Pierre Le Page, Sinead O'Driscoll

**King's College Hospital NHS Foundation Trust and King's College London**

Ajay M Shah, Rosita Zakeri, Kevin O'Gallagher

**Leeds Teaching Hospitals NHS Trust**

Kate Gatenby

**Leeds Teaching Hospitals NHS Trust and University of Leeds**

John P Greenwood, Sven Plein

**Liverpool University Hospitals NHS Foundation Trust**

Prathap Kanagala

**Manchester University NHS Foundation Trust and University of Manchester**

Christopher A Miller, Fardad Soltani

**Mid & South Essex NHS Foundation Trust**

Rachael Arnold, Swapna Kunhunny

**Newcastle upon Tyne Hospitals NHS Foundation Trust**

Adam K McDiarmid, Azfar Zaman

**NHS Greater Glasgow and Clyde and University of Glasgow**

Mark C Petrie

**NHS Golden Jubilee**

Colin Berry

**NHS Lothian**

Marc R Dweck

**NHS Tayside**

Chim Lang, Ify Mordi

**Norfolk and Norwich University Hospitals NHS Foundation Trust**

Pankaj Garg

**North Tees and Hartlepool NHS Foundation Trust**

Matthew Dewhurst, Karen Hann

**Northumbria Healthcare NHS Foundation Trust**

David P Ripley, Thomas Green

**North West Anglia NHS Foundation Trust**

Fady Magdy

**University of Oxford, Oxford University Hospitals NHS Foundation Trust, Oxford NIHR****Biomedical Research Centre**

Stefan Neubauer, Oliver Rider

**Royal Brompton & Harefield Hospitals**

Sanjay K Prasad, Chiara Bucciarelli-Ducci

**Royal Devon University Healthcare NHS Foundation Trust**

Andrew J Ludman

**Royal Free London NHS Foundation Trust**

Ameet Bakhai

**Salisbury NHS Foundation Trust**

Thomas Jackson

**Sheffield Teaching Hospitals NHS Foundation Trust**

Abdallah Al-Mohammad

**South Tees Hospitals NHS Foundation Trust**

David Austin, Mike Chapman

**South Tyneside and Sunderland NHS Foundation Trust**

Janine Beezer

**Southern Health and Social Care Trust**

Patricia Campbell

**St George's University of London and St George's Healthcare NHS Foundation Trust**

Lisa J Anderson

**University Hospital Southampton NHS Foundation Trust**

Andrew Flett, Paul Haydock

**University Hospitals Birmingham NHS Foundation Trust**

Peysh Patel, Rick Steeds

**University Hospitals Coventry and Warwickshire NHS Trust**

Prithwish Banerjee

**University Hospitals Dorset NHS Trust**

Raj Chahal

**University Hospitals of Leicester NHS Trust**

Gerry P McCann, Iain Squire

**University of Liverpool**

Susanna Dodd (Senior statistician)

**University of Manchester**

Niels Peek (Health informatics and data science)

## **Supplemental methods**

### **Study duration**

Participants will remain in the study for 10 years from when they provide consent. It is anticipated that at the end of the study, anonymised study data will be transferred to a managed-access research or scientific archive.

### **Authorship**

A policy for authorship that follows the principles of the International Committee of Medical Journal Editors, written by the Executive Steering Committee and agreed by the Working Group, is in place (available at <https://www.ukhfpef.org/>).

### **Data Sharing**

Participants are asked to provide consent for pseudonymised participant-level study data to be shared for research purposes. Requests for access to data are managed by the Executive Steering Committee. Release of data is subject to scientific review by the Executive Steering Committee and an appropriate Data Transfer Agreement. A Collaboration and Support Policy, written by the Executive Steering Committee and agreed by the Working Group, describes the framework for collaborations (available at <https://www.ukhfpef.org/>).



**Supplemental Table 1. Core clinical laboratory investigations**

|                             |
|-----------------------------|
| BNP or NT-Pro BNP           |
| hs-Troponin T or I          |
| Haemoglobin                 |
| MCV                         |
| Haematocrit                 |
| White cell count            |
| Sodium                      |
| Potassium                   |
| Urea                        |
| Creatinine                  |
| eGFR                        |
| Albumin                     |
| Alkaline phosphatase        |
| Bilirubin                   |
| Alanine aminotransferase    |
| CRP                         |
| Iron                        |
| Ferritin                    |
| Transferrin saturation      |
| Thyroid stimulating hormone |
| Free T4                     |
| HBA1c                       |

**Additional clinical laboratory investigations, to record if available**

|                                  |
|----------------------------------|
| IgG                              |
| IgA                              |
| IgM                              |
| Serum protein electrophoresis    |
| Urine Bence Jones protein        |
| Urine albumin : creatinine ratio |
| Urine dipstick proteinuria       |

BNP = Brain natriuretic peptide; CRP C-reactive protein; eGFR = estimated glomerular filtration rate; hs = high sensitivity; Ig = Immunoglobulin; MCV = mean corpuscular volume; NTproBNP = N-terminal pro B-type natriuretic peptide.

**Supplemental Table 2. Echocardiography protocol**

Standard echo acquisition in line with the British Society of Echocardiography Minimum Dataset.<sup>1</sup>  
Key views and corresponding measurements are as follows:

| Key views                                           | Measurements                                                                                     |
|-----------------------------------------------------|--------------------------------------------------------------------------------------------------|
| Parasternal long axis 2D                            | LV end-diastolic dimension (cm)<br>LV end-systolic dimension (cm)<br>Maximum wall thickness (mm) |
| Parasternal long axis RV inflow CWD                 | TR $V_{\max}$ (m/s)                                                                              |
| Apical 4 chamber 2D                                 | LV ejection fraction (%)                                                                         |
| Apical 2 chamber 2D                                 | LV ejection fraction (%)                                                                         |
| Apical 4 chamber 2D GLS*                            | Peak GLS (%)                                                                                     |
| Apical 2 chamber 2D GLS*                            | Peak GLS (%)                                                                                     |
| Apical long axis 2D GLS*                            | Peak GLS (%)                                                                                     |
| Apical 4 chamber 2D optimised for LA volume         | LA volume (cm <sup>3</sup> )                                                                     |
| Apical 2 chamber 2D optimised for LA volume         | LA volume (cm <sup>3</sup> )                                                                     |
| Apical 4 chamber mitral valve PWD                   | E $V_{\max}$ (cm/s)<br>A $V_{\max}$ (cm/s)<br>DT (ms)                                            |
| Apical 4 chamber mitral valve TDI                   | Lateral e' (cm/s)<br>Septal e' (cm/s)                                                            |
| Apical 5 chamber aortic valve CWD                   | AV $V_{\max}$ (m/s)                                                                              |
| Apical 4 chamber modified for RV/RA 2D              | Basal RV diameter<br>Visual assessment of RV function                                            |
| Apical 4 chamber modified for RV/RA CWD             | TR $V_{\max}$ (m/s)                                                                              |
| Apical 4 chamber lateral tricuspid valve annulus MM | TAPSE (cm)                                                                                       |
| Apical 4 chamber right ventricle TDI                | RV S' (cm/s)                                                                                     |
| Subcostal 2D +/- MM                                 | IVC diameter (mm)<br>IVC diameter during inspiration (mm)                                        |
| Multiple views                                      | Mitral, aortic and tricuspid valve function<br>Pericardial effusion (present/absent)             |

\* As permitted by image quality and local feasibility.

2D = Two-dimensional; A  $V_{\max}$  = Peak velocity in late diastole; AV  $V_{\max}$  = Aortic valve peak velocity; CWD = Continuous wave Doppler; DT = Flow deceleration time from peak E wave to end of E wave signal; E  $V_{\max}$  = Peak velocity in early diastole; GLS = Global longitudinal strain; IVC = Inferior vena cava; LA = Left atrium; LV = Left ventricle; MM = M-mode; PWD = Pulsed wave Doppler; RV = Right ventricle; TAPSE = Tricuspid Annular Plane Systolic Excursion; TDI = Tissue Doppler imaging; TR  $V_{\max}$  = Tricuspid regurgitation peak velocity;

1. Robinson et al. A practical guideline for performing a comprehensive transthoracic echocardiogram in adults: the British Society of Echocardiography minimum dataset *Echo Red Pract.* 2020; 4: G59-G93.

### Supplemental Table 3. Cardiovascular magnetic resonance protocol

#### Core

- Localisers
- CH4 cine.
- CH2 cine.
- CH3 cine.
- LVOT cine
- Aortic valve cine
- Gadolinium based contrast agent in line with local policy.
- LV short axis cine stack.
- TI Scout
- LGE segmented inversion recovery and PSIR. CH4, CH2, CH3 and short axis stack

#### Supplemental

- T1 mapping basal and mid short axis, before and after Gadolinium
- CH4 fat-water sequence.
- T2 mapping. Mid short axis.
- Aortic candy stick cine
- Cine perpendicular to the ascending and descending aorta at pulmonary bifurcation level, with measurement of blood pressure.
- Phase encoded velocity mapping perpendicular to the main pulmonary artery.
- 3D Dixon fat-water sequence, centred over the renal arteries.
- Perfusion imaging if being performed clinically

#### Notes

- 1.5T or 3T
- The protocol is split into core and supplementary sequences. It is expected that core sequences would be performed as part of a standard clinical CMR.
- As part of site set-up, the central study team will liaise with the site regarding the details of the CMR protocol appropriate for the site, and provide site-specific CMR guidance. The protocol is a guide.

CH = chamber; LGE = late gadolinium enhancement; LV = left ventricle; LVOT = left ventricular outflow tract; PSIR = Phase-sensitive inversion recovery; TI = inversion time.
